# Supplementary material for: Pre-harvest climate and post-harvest acclimation to cold prevent from superficial scald development in Granny Smith apples
Source: PubMed Central journal article supplement (PMC7148358; doi:10.1038/s41598-020-63018-3), 2020-04-10
Supplement: 41598_2020_63018_MOESM1_ESM.pdf [file 41598_2020_63018_MOESM1_ESM.pdf]

**Pre-harvest climate and post-harvest acclimation to cold prevent from superficial scald development in Granny Smith apples.**

Mathieu Marc<sup>1</sup>, Maryline Cournol<sup>1</sup>, Sylvain Hanteville<sup>1</sup>, Anne-Sophie Poisson<sup>1</sup>, Marie-Charlotte Guillou<sup>1</sup>, Sandra Pelletier<sup>1</sup>, François Laurens<sup>1</sup>, Christine Tessier<sup>2</sup>, Claude Coureau<sup>2,3</sup>, Jean-Pierre Renou<sup>1</sup>, Mickaël Delaire<sup>1</sup> & Mathilde Orsel<sup>1\*</sup>

<sup>1</sup>IRHS, Université d'Angers, AgroCampus Ouest, INRAE, SFR 4207 QuaSaV, 42 rue Georges Morel, 49071, Beaucouzé cedex, France

<sup>2</sup>Station d'expérimentation fruitière La Morinière, 37800 Saint-Epain, France

<sup>3</sup>Centre technique interprofessionnel des fruits et légumes (CTIFL), France

\*Corresponding author: [mathilde.orsel-baldwin@inrae.fr](mailto:mathilde.orsel-baldwin@inrae.fr)

**Supplementary Fig. S1 Effect of year and fruit maturity on superficial scald severity**

**Supplementary Fig. S2 Additional pre-harvest climatic variables**

**Supplementary Fig. S3 Effect of acclimation on superficial scald severity**

**Supplementary Fig. S4 Effect of cold storage on relative gene expression (RT-qPCR)**

**Supplementary Table S1 Harvest dates**

**Supplementary Table S2 Primers used for RT-qPCR**

**a**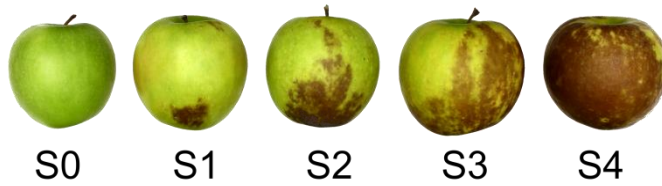**b**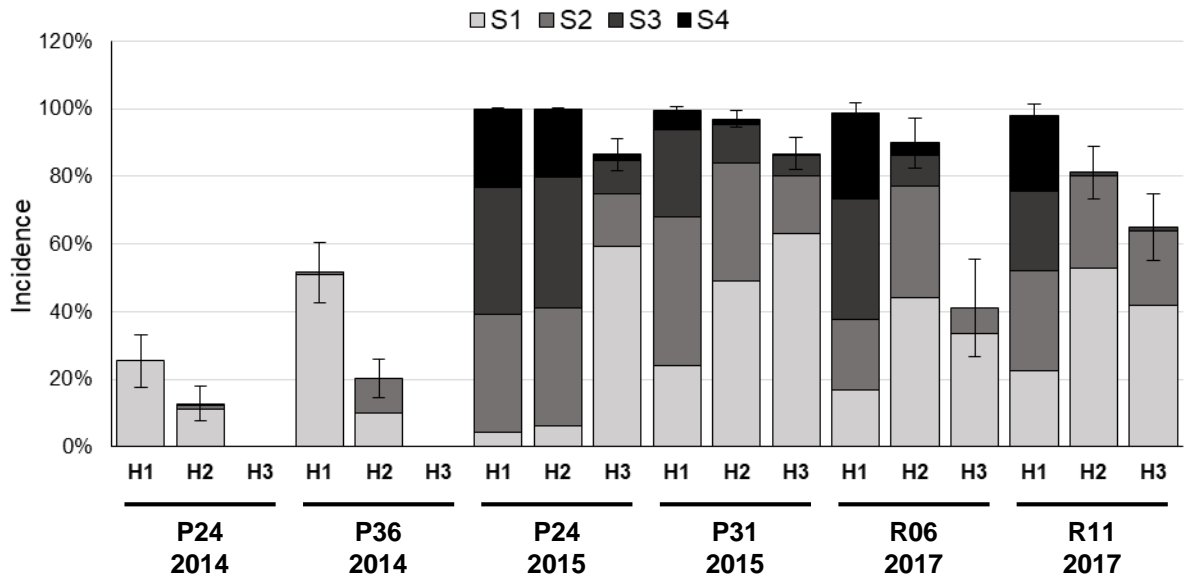

### Supplementary Fig. S1 Effect of year and fruit maturity on superficial scald severity

(a) Superficial scald severity scale according to the relative surface area affected by symptoms as following:

S0, no symptom; S1, > 0 % to 25 %; S2, > 25 % to 50 %; S3, > 50 % to 75 %; S4, > 75 % of affected surface area.

(b) Annual scald incidence and severity according to maturity at harvest. Fruit were harvested at three

different maturity stages, early (H1), optimal (H2) or late (H3), from two different orchards each year in 2014, 2015 and 2017, and stored under cold controlled atmosphere for 5 to 6 months (see Fig. 1). Values are proportion of fruit per class, and binomial confidence interval for incidence ( $n = 100$  to  $200$ ,  $\alpha = 0.05$ ).

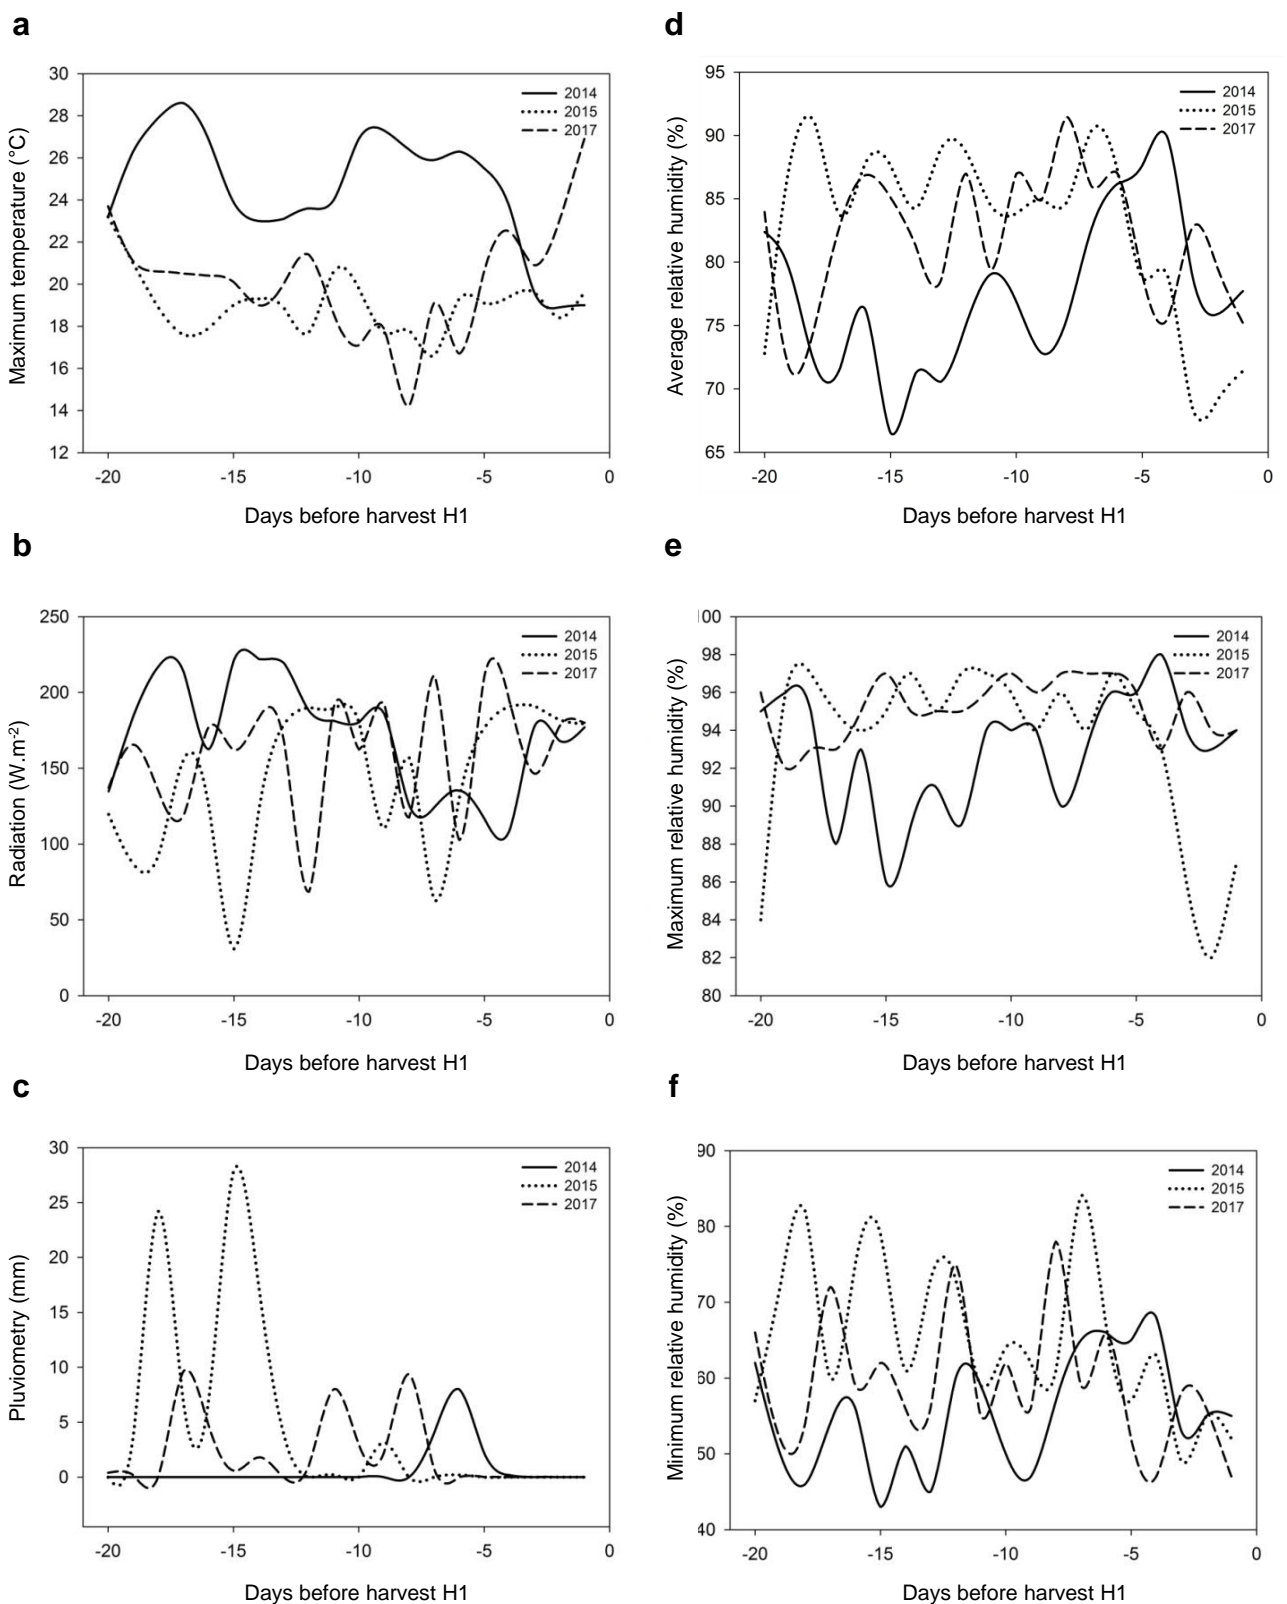

### Supplementary Fig. S2 Additional pre-harvest climatic variables

Orchard climatic data were retrieved on a daily base, each year, for 20 d before early harvest H1. Mean and minimum daily temperatures (°C) are presented Fig. 2c and 2d; (a) maximum daily temperatures (°C), (b) Radiation (W m<sup>-2</sup>), (c) Pluviometry (mm), (d) average, (e) maximum and (f) minimum relative humidity (%).

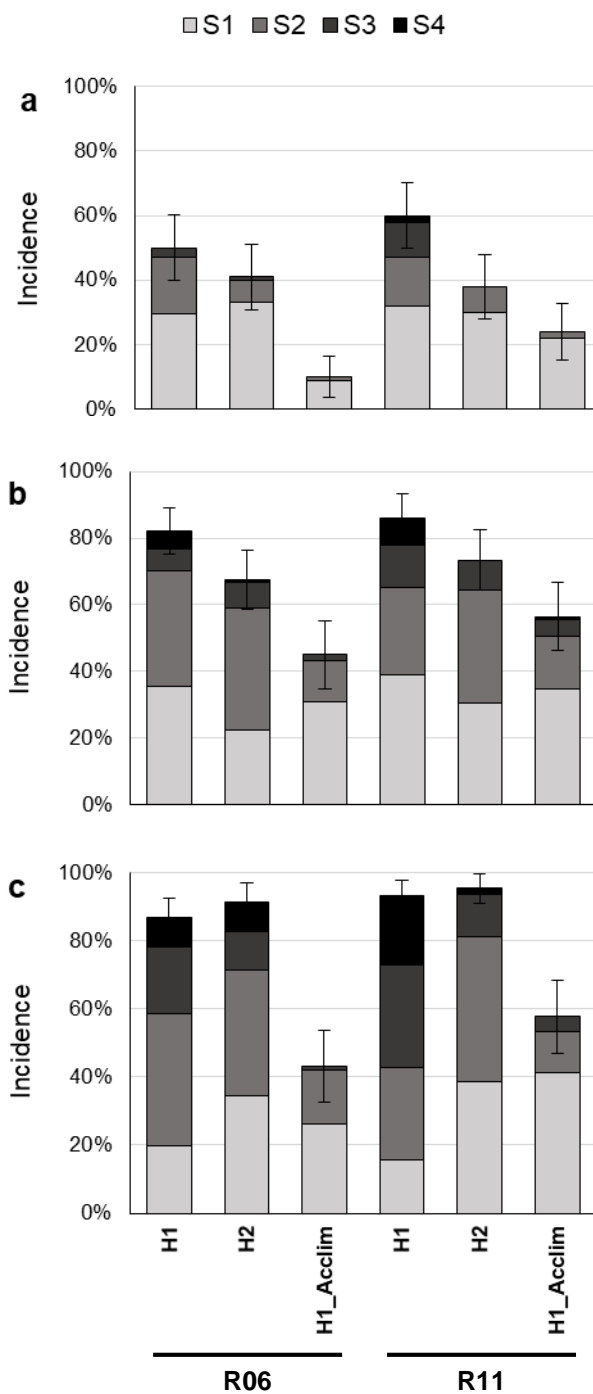

### Supplementary Fig. S3 Effect of acclimation on superficial scald severity

Scald incidence and severity according to acclimation treatment (H1-acclim) or harvest stage (H1 and H2) (see Fig. 4a). Fruit were harvested from two different plots and stored under classic cold conditions for **(a)** 3 months, **(b)** 4 months and **(c)** 5 months. Severity scale according to the relative surface area affected by symptoms as following: S1, > 0 % to 25 %; S2, > 25 % to 50 %; S3, > 50 % to 75 %; S4, > 75 % of affected surface area. Values are proportion of fruit per class, and binomial confidence interval for incidence (n = 100,  $\alpha = 0.05$ ).

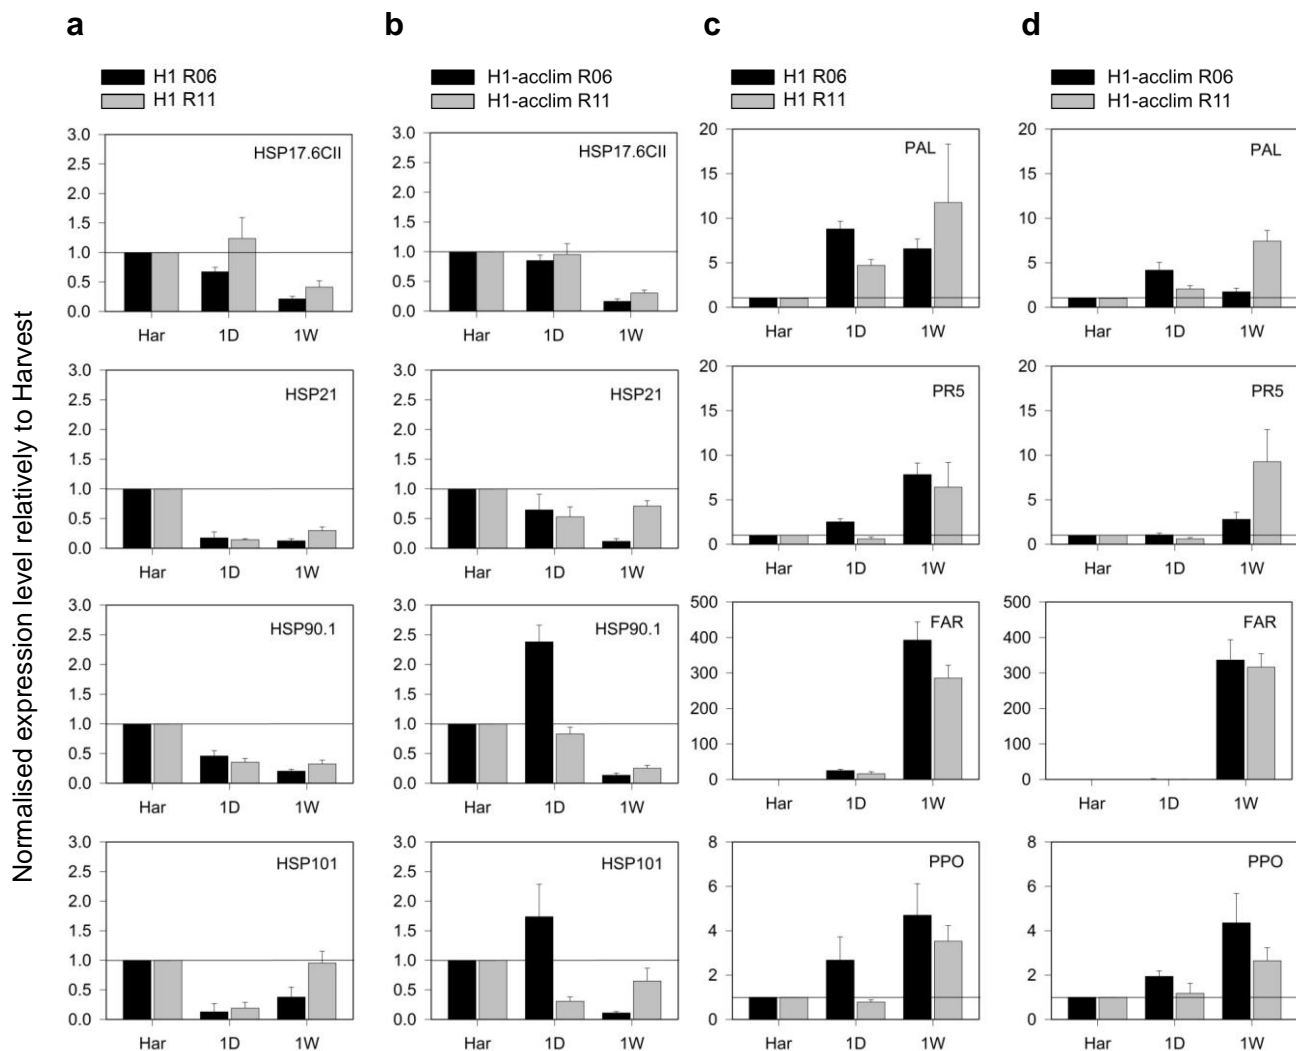

### Supplementary Fig. S4 Effect of cold storage on relative gene expression (RT-qPCR)

Normalised relative gene expression in fruit peel samples after one day (1D) and one week (1W) of classic cold storage (H1, **a** and **c**) or acclimation (H1-acclim, **b** and **d**). Expression relatively to harvest stage (Har) for HSP17.6CII (*MD15G1053800*), HSP21 (*MD13G1108500*), HSP90.1 (*MD01G1208700*), HSP101 (*MD06G1201600*) (**a** and **b**), PAL (*MD12G1116700*), PR5 (*MD04G1064200*), FAR (*MD10G1311000*) and PPO (*MD10G1299400*) (**c** and **d**). Data are mean values  $\pm$  SD of  $n = 3$  for fruit collected in both orchards R06 and R11.

## Supplementary Table S1 Harvest dates

|                     | Starch index | Harvest dates |            |            |
|---------------------|--------------|---------------|------------|------------|
|                     | (SI)         | 2014          | 2015       | 2017       |
| <b>H1 (early)</b>   | 3            | 2014-09-25    | 2015-10-01 | 2017-09-25 |
| <b>H2 (optimal)</b> | 5            | 2014-10-06    | 2015-10-08 | 2017-10-03 |
| <b>H3 (late)</b>    | 7            | 2014-10-20    | 2015-10-15 | 2017-10-10 |

## Supplementary Table S2 Primers used for RT-qPCR

| Type of gene | Short Name | MD gene      | GDDH13 Annotation                           | Primer sequence                                           |
|--------------|------------|--------------|---------------------------------------------|-----------------------------------------------------------|
| GOI          | HSP17.6CII | MD15G1053800 | Heat shock protein 17.6 kDa class II        | F GATGCGATTTCTGCTGTTTG<br>R TCCCCGCATGATTACTCTCA          |
| GOI          | HSP21      | MD13G1108500 | Heat shock protein 21                       | F CCAAGAGCTATGGGAGGTAC<br>R TACCGGAAAGTCATGGAAGC          |
| GOI          | HSP40      | MD10G1289200 | DNAJ heat shock family protein              | F CCCAAAGACCCCTCCAAGAA<br>R TTCACATAGCACATCGGCTC          |
| GOI          | HSP90.1    | MD01G1208700 | Heat shock protein 90.1                     | F AATTCACCGGATGTTGAAGC<br>R TGACATCCCAATTGACTCCA          |
| GOI          | HSP101     | MD06G1201600 | Heat shock protein 101                      | F GCAGAAGTCGGATGTGTTGA<br>R CCGGAACTGTTCTGCATTTT          |
| GOI          | PAL        | MD12G1116700 | PHE ammonia lyase 1                         | F GGATCTCCTCAAAGTTGTCCG<br>R CTCACTCTCGCCATTTGTC          |
| GOI          | PR5        | MD04G1064200 | Thaumatococin (PR-5)                        | F AAAGGGGCTCGCATTTGG<br>R CTTGGCATTGGAGGACACC             |
| GOI          | FAR        | MD10G1311000 | Terpene Synthase (TPS)                      | F GATATTTTAGATGAGGCGAAAGC<br>R GCGTTGATTTGCCATTTGAC       |
| GOI          | PPO        | MD10G1299400 | Polyphenol oxidase, chloroplastic           | F TGCCCGCCGCCTTCCAC<br>R GCTCCATCGCTTTGTAGTATTTGTC        |
| GOI          | LOX        | MD11G1023100 | Lipoxygenase 1                              | F GTTGCATGATGGGAAGGAATGG<br>R GGATAGTAGTGGTTTACATAGTCAGTG |
| GOI          | EXGT       | MD16G1145200 | Xyloglucan endotransglucosylase/hydrolase   | F GACGGCGTAGGAGTGGTAAG<br>R AAACAACGAACACGACGAGA          |
| GOI          | IMS1       | MD05G1155100 | 2-isopropylmalate synthase                  | F GCCATGATCTGGACGAAAAG<br>R GGCCACCTGATAAACCAATG          |
| Ref          | VDAC2      | MD02G1185100 | Voltage dependent anion channel 2           | F CGCCCAAATTTATTGAAGCA<br>R ATCCCCAGCCATTGATTTTT          |
| Ref          | GAPDH      | MD16G1111100 | Glyceraldehyde-3-phosphate dehydrogenase C2 | F ATCAATGAAGGACTGGAGAGG<br>R GTCAGGTCAACAACGGAAAC         |
| Ref          | EIF3K      | MD15G1223700 | Eukaryotic translation initiation factor 3K | F GCAAGCAATCCAAGCCTATG<br>R ACTTCGAGGTAGGACAATG           |
